# Supplementary material for: COVID19 vaccine type and humoral immune response in patients receiving dialysis
Source: bioRxiv or medRxiv preprint supplement (doi:10.1101/2021.08.02.21261516), 2021-08-04
Supplement: Supplementary file [file media-1.pdf]

# **COVID19 vaccine type and humoral immune response in patients receiving dialysis**

## **Table of Contents**

|                                                                                     |           |
|-------------------------------------------------------------------------------------|-----------|
| <b>Supplemental Methods</b>                                                         | <b>p2</b> |
| <b>Supplemental Table 1</b> Characteristics of patients on dialysis by vaccine type | <b>p3</b> |

## Supplemental Methods

### Assay Characteristics

The Siemens total RBD Ig assay measures IgG and IgM antibodies. This assay is reported by the manufacture to have 100% sensitivity and 99.8% specificity for tests performed  $\geq 14$  days after a positive reverse transcriptase polymerase chain reaction test<sup>1</sup>; it has been validated independently with similar performance characteristics<sup>2, 3</sup>. We used one of two Siemens RBD IgG assays, which are semiquantitative two-step sandwich indirect chemiluminescent assay with a manufacturer reported 95.6% (95% CI: 92.2-97.8%) sensitivity and 99.9% (95% CI 99.6-99.9%) specificity for tests performed  $\geq 21$  days post positive reverse transcriptase polymerase chain reaction test. An index value  $\geq 1.0$  is considered reactive. The two assays are compatible using a conversion factor, but one has a larger maximal index value range ( $>44$  versus  $> 150$ ).

We classified responses as absent total RBD Ig antibody, absent semiquantitative IgG antibody (index value  $< 1$ ), diminished antibody (semiquantitative IgG index value  $< 10$ ), or medium to high antibody ( $\geq 10$ )<sup>4</sup>. We chose index value  $\geq 10$  as a cut-point based on a Siemens study (n=74) evaluating correlation with plaque reduction neutralization test which reported index values  $\geq 10$  had a positive predictive value of 100% for plaque reduction neutralization test<sup>5</sup>  $> 1:80$ .

### REFERENCES

1. U.S. Food & Drug Administration. *EUA Authorized Serology Test Performance*. 2020. Accessed June 28, 2021. <https://www.fda.gov/medical-devices/coronavirus-disease-2019-covid-19-emergency-use-authorizations-medical-devices/eua-authorized-serology-test-performance>
2. Schnurra C, Reiners N, Biemann R, Kaiser T, Trawinski H, Jassoy C. Comparison of the diagnostic sensitivity of SARS-CoV-2 nucleoprotein and glycoprotein-based antibody tests. *J Clin Virol*. Aug 2020;129:104544. doi:10.1016/j.jcv.2020.104544
3. Public Health England. *Evaluation of sensitivity and specificity of 4 commercially available SARS-CoV-2 antibody immunoassays*. . 2020. Accessed June 6, 2021. [https://assets.publishing.service.gov.uk/government/uploads/system/uploads/attachment\\_data/file/898437/Evaluation\\_of\\_sensitivity\\_and\\_specificity\\_of\\_4\\_commercially\\_available\\_SARS-CoV-2\\_antibody\\_immunoassays.pdf](https://assets.publishing.service.gov.uk/government/uploads/system/uploads/attachment_data/file/898437/Evaluation_of_sensitivity_and_specificity_of_4_commercially_available_SARS-CoV-2_antibody_immunoassays.pdf)
4. Anand S, Montez-Rath ME, Han J, et al. Serial SARS-CoV-2 Receptor-Binding Domain Antibody Responses in Patients Receiving Dialysis. *Ann Intern Med*. May 18 2021;doi:10.7326/M21-0256

**Supplemental Table 1** Characteristics of patients on dialysis by vaccine type

|                                                         | Overall   | mRNA1273  | BNT162b2 | Ad26.COV2.S |
|---------------------------------------------------------|-----------|-----------|----------|-------------|
| Patient characteristics                                 | N=2099    | N=1316    | N=416    | N=367       |
| <b>Age</b>                                              |           |           |          |             |
| 18-44                                                   | 180 (8)   | 87 (7)    | 36 (9)   | 57 (16)     |
| 45-64                                                   | 685 (33)  | 365 (28)  | 106 (25) | 214 (58)    |
| 65-79                                                   | 885 (42)  | 606 (46)  | 195 (47) | 84 (23)     |
| ≥80                                                     | 349 (17)  | 258 (20)  | 79 (19)  | 12 (3)      |
| <b>Gender</b>                                           |           |           |          |             |
| M                                                       | 1277 (61) | 792 (60)  | 264 (63) | 221 (60)    |
| F                                                       | 822 (39)  | 524 (40)  | 152 (37) | 146 (40)    |
| <b>Race and Ethnicity</b>                               |           |           |          |             |
| Hispanic                                                | 721 (34)  | 406 (31)  | 165 (40) | 150 (41)    |
| Non-Hispanic white                                      | 522 (25)  | 316 (24)  | 109 (26) | 97 (26)     |
| Non-Hispanic Black                                      | 209 (10)  | 81 (6)    | 28 (7)   | 100 (27)    |
| Asian                                                   | 312 (15)  | 263 (20)  | 42 (10)  | 7 (2)       |
| Other                                                   | 61 (3)    | 49 (4)    | 9 (2)    | 3 (1)       |
| Missing                                                 | 274 (13)  | 201 (15)  | 63 (15)  | 10 (3)      |
| <b>Geographic region</b>                                |           |           |          |             |
| South                                                   | 464 (22)  | 73 (6)    | 38 (9)   | 353 (96)    |
| West                                                    | 1635 (78) | 1243 (94) | 378 (91) | 14 (4)      |
| <b>Dialysis Modality</b>                                |           |           |          |             |
| Hemodialysis                                            | 1176 (84) | 1111 (85) | 354 (85) | 311 (85)    |
| CCPD                                                    | 266 (13)  | 176 (13)  | 49 (12)  | 41 (11)     |
| CAPD                                                    | 25 (1)    | 18 (1)    | 2 (1)    | 5 (1)       |
| Home Hemodialysis                                       | 32 (2)    | 11 (1)    | 11 (2)   | 10 (3)      |
| <b>ESKD Vintage (years)</b>                             |           |           |          |             |
| < 2                                                     | 799 (38)  | 506 (38)  | 173 (42) | 120 (33)    |
| 2 – 5                                                   | 726 (35)  | 455 (35)  | 143 (34) | 128 (35)    |
| ≥ 5                                                     | 574 (27)  | 355 (27)  | 100 (24) | 119 (32)    |
| <b>Diabetes</b>                                         |           |           |          |             |
| Yes                                                     | 1350 (64) | 848 (64)  | 258 (62) | 244 (66)    |
| No                                                      | 749 (36)  | 464 (36)  | 158 (38) | 123 (34)    |
| <b>RBD antibody status prior to vaccine<sup>^</sup></b> |           |           |          |             |
| Seropositive                                            | 696 (33)  | 361 (27)  | 141 (34) | 194 (53)    |
| Seronegative                                            | 1403 (67) | 955 (73)  | 275 (66) | 173 (47)    |

Abbreviations: CCPD, continuous cycloer-assisted peritoneal dialysis; CAPD, continuous automated peritoneal dialysis; ESKD, end-stage kidney disease; RBD, receptor-binding domain;

<sup>^</sup>seropositive prior to vaccination indicates likely SARS-CoV-2 infection prior to vaccination
